# Supplementary material
Source: PubMed Central journal article supplement (PMC2649098)
Supplement: M807401200_1.pdf [file M807401200_1.pdf]

Supplementary Data

**SOLUTION STRUCTURE OF THE Na<sub>v</sub>1.2 C-TERMINAL EF-HAND DOMAIN**  
**Vesselin Z. Miloushev, Joshua A. Levine, Mark A. Arbing, John F. Hunt,**  
**Geoffrey S. Pitt, and Arthur G. Palmer III**

**Supplementary Table SI**

| <b>Isoform</b>      | <b>Mutation in CTD</b> | <b>I<sub>Na</sub></b>  | <b>Voltage dependence of Inactivation</b> | <b>Kinetics of Slow Inactivation</b> | <b>Residue in Na<sub>v</sub>1.2 CTD</b> |
|---------------------|------------------------|------------------------|-------------------------------------------|--------------------------------------|-----------------------------------------|
| Na <sub>v</sub> 1.1 | F1808L                 | persistent             | – shift                                   | ↔ <sup>1</sup>                       | F1798                                   |
|                     | D1866Y                 | persistent             | + shift                                   | ↔                                    | D1856                                   |
|                     | M1852T                 | decreased <sup>2</sup> |                                           | ↔                                    | M1842                                   |
| Na <sub>v</sub> 1.5 | V1777M                 | persistent             | – shift                                   |                                      | V1781                                   |
|                     | E1784K                 | persistent             | – shift                                   | ↔                                    | E1788                                   |
|                     | D1790G                 | ↔                      | – shift with β subunit                    | ↔                                    | D1794                                   |
|                     | Y1795insD              | decreased, persistent  | ↔ <sup>3</sup>                            | ↔ <sup>4</sup>                       | Y1799                                   |
|                     | Y1795C                 | persistent             | ↔                                         | ↓                                    | Y1799                                   |
|                     | Y1795H                 | decreased, persistent  | – shift                                   | ↑                                    | Y1799                                   |
|                     | W1798E <sup>5</sup>    | persistent             | – shift                                   |                                      | W1802                                   |
|                     | L1825P                 | decreased, persistent  | – shift                                   | ↓                                    | L1829                                   |
|                     | R1826H                 | persistent             |                                           | ↔ <sup>6</sup>                       | L1830                                   |
|                     | I1853E <sup>5</sup>    | persistent             | – shift                                   |                                      | I1857                                   |

Correspondence between isoforms was obtained through sequence alignment of Na<sub>v</sub>1 C-terminal Domains, performed with CLUSTALW (1), with sequences of human Na<sub>v</sub>1 channels (2) retrieved from NLM-NCBI. The references for the data above are as follows F1808L (3), D1866Y (4), M1852T (5), V1777M (6), E1784K (7,8), D1790G (9,10), Y1795insD (11,12), Y1795C/H (13,14), W1798E (13,14), L1825P (15), R1826H (16), I1853E (13,14). <sup>1</sup>F1808 was observed to have a larger proportion of channels exhibiting slow inactivation (5). <sup>2</sup>Lower relative expression is implicated as the cause of decreased current (5). <sup>3</sup>There is conflicting data on the voltage dependence of inactivation (11,12). <sup>4</sup>Kinetics of slow inactivation are only slightly increased over wild-type (11), with the predominant effect being on fast-inactivation (12). <sup>5</sup>W1798E and I1853E are synthetic mutants created to probe the helix I – IV interface (13,14). <sup>6</sup>The predominant effect for R1826H appears to be on fast inactivation (16).

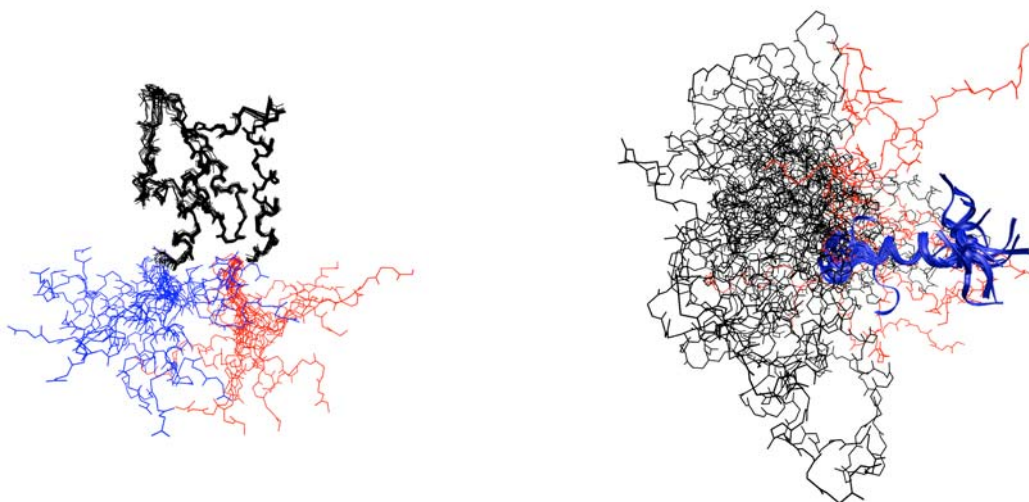

**Figure S1.** Superposition of Nav<sub>v</sub>1.2 (1777-1882) CTD structural ensemble. The N-terminal region (residues 1777-1789) is colored red, the core domain (residues 1790-1868) is colored black, and the C-terminal region (residues 1869-1882) is colored blue. (left) The ordered core residues 1790-1868 are superposed; the N- and C-terminal regions are disordered. (right) The residues 1870-1876 are superposed and are shown as a backbone ribbon to more clearly illustrate helix V. The N-terminal region is disordered and the core domain does not have a fixed orientation relative to helix V.

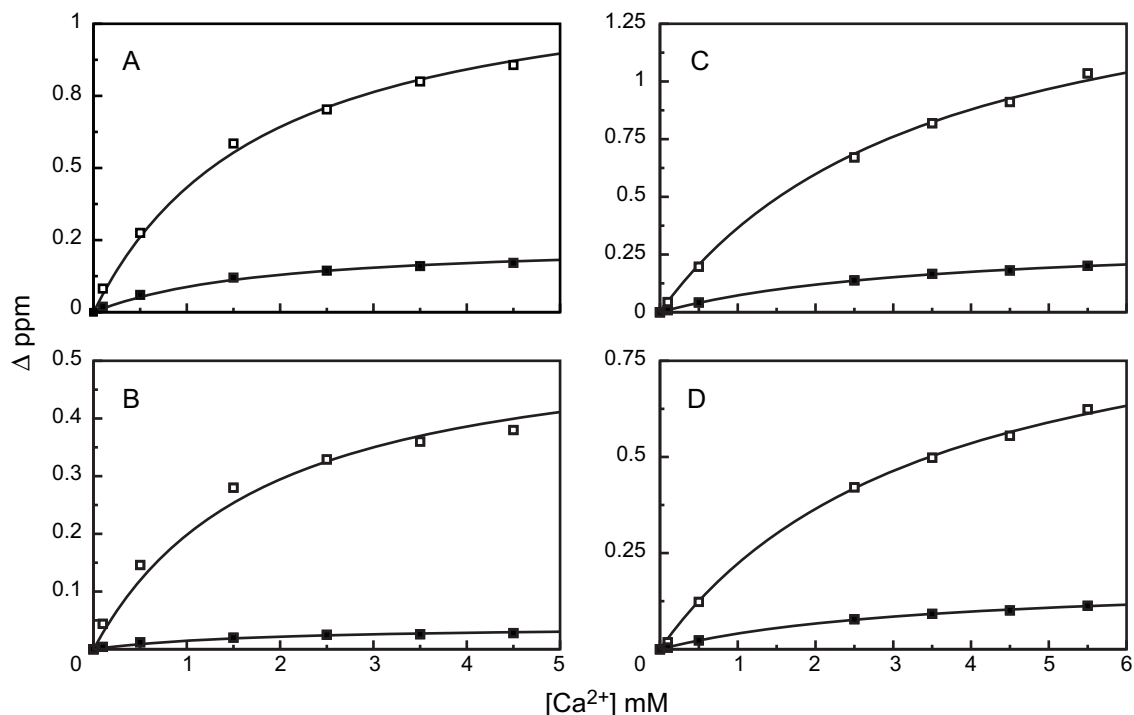

**Figure S2.** Calcium titration of Nav<sub>v</sub>1.2 and Nav<sub>v</sub>1.5. For Nav<sub>v</sub>1.2 representative residues L1790 (panel A) and L1830 (panel B) are shown. For Nav<sub>v</sub>1.5 residues L1786 (panel C) and R1826 (panel D) are shown. Plots show Ca<sup>2+</sup> concentration versus change of the <sup>1</sup>H (closed symbols) and <sup>15</sup>N (open symbols) chemical shifts. Fitting of dissociation constants was performed globally with 103 and 83 residues, for Nav<sub>v</sub>1.2 and Nav<sub>v</sub>1.5 respectively, using Mathematica. Globally fitted dissociation rate constants are  $1.65 \pm 0.03$  mM and  $3.28 \pm 0.13$  mM for Nav<sub>v</sub>1.2 and Nav<sub>v</sub>1.5 respectively.

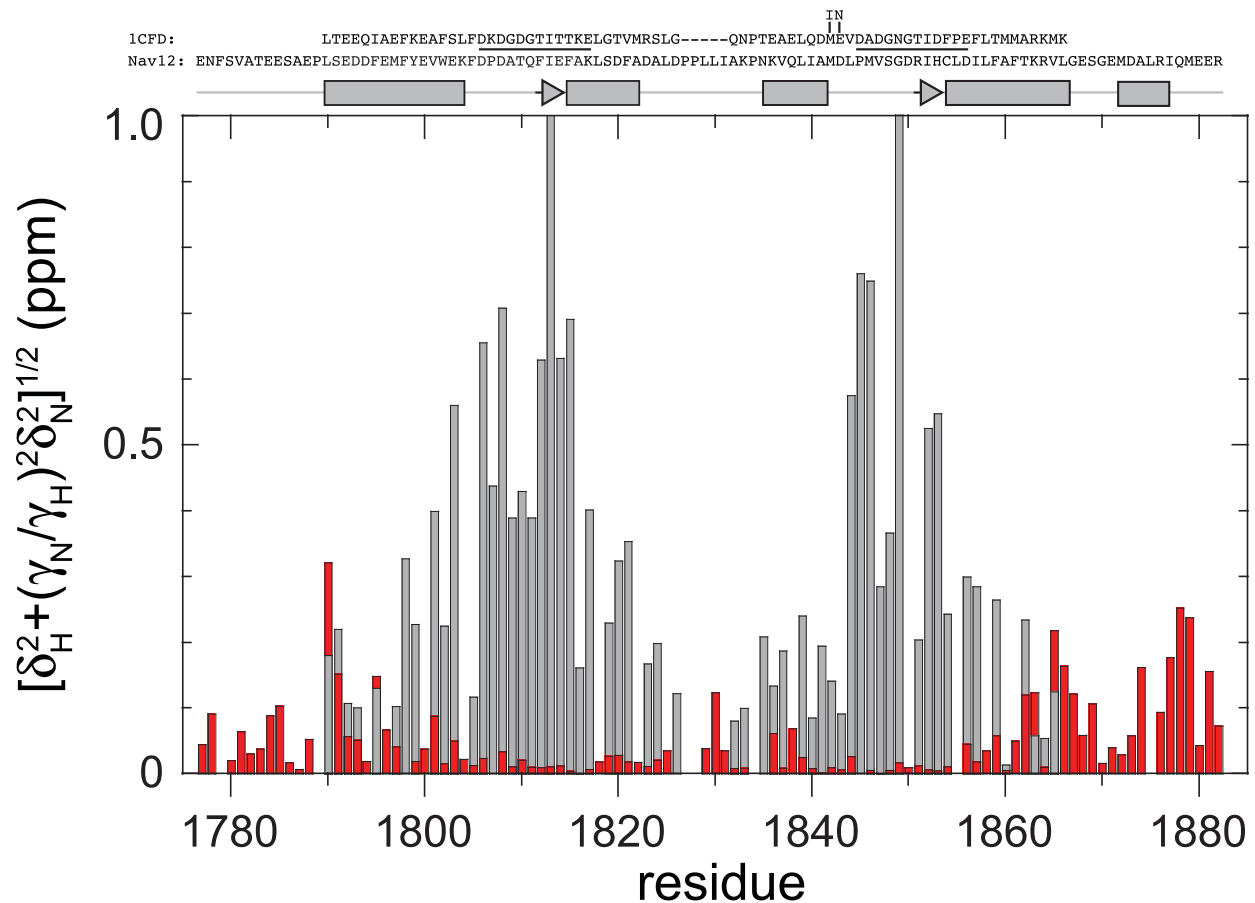

**Figure S3.** Calcium-induced shift perturbations for (red) Nav<sub>v</sub>1.2 and (grey) N-terminal EF hand pair of calmodulin. Residue T27 in calmodulin has a shift perturbation of 2.22 ppm and G60 has a shift perturbation of 1.23 ppm. Chemical shift differences between Ca<sup>2+</sup>-bound and apo calmodulin were obtained from published chemical shift assignments (17,18). (top) Structure-based sequence alignment of Nav<sub>v</sub>1.2 (residues 1790-1866) and the N-terminal EF-hand pair of calmodulin (residues 4-77) (1CFD). The alignment was performed with CE (19). The helix II-III interhelical segment sequence (PPLLI) is not present in the calmodulin sequence and the indicated IN sequence in calmodulin is not present in Nav<sub>v</sub>1.2. The Ca<sup>2+</sup> binding regions in calmodulin and the corresponding residues in Nav<sub>v</sub>1.2 are indicated by the two horizontal bars between the sequence designations. The secondary structure of Nav<sub>v</sub>1.2 is indicated schematically.

### References

1. Larkin, M. A., Blackshields, G., Brown, N. P., Chenna, R., McGettigan, P. A., McWilliam, H., Valentin, F., Wallace, I. M., Wilm, A., Lopez, R., Thompson, J. D., Gibson, T. J., and Higgins, D. G. (2007) *Bioinformatics* **23**, 2947-2948
2. Goldin, A. L., Barchi, R. L., Caldwell, J. H., Hofmann, F., Howe, J. R., Hunter, J. C., Kallen, R. G., Mandel, G., Meisler, M. H., Netter, Y. B., Noda, M., Tamkun, M. M., Waxman, S. G., Wood, J. N., and Catterall, W. A. (2000) *Neuron* **28**, 365-368
3. Rhodes, T. H., Vanoye, C. G., Ohmori, I., Ogiwara, I., Yamakawa, K., and George, A. L. (2005) *J. Physiol.* **569**, 433-445

4. Spampanato, J., Kearney, J. A., de Haan, G., McEwen, D. P., Escayg, A., Aradi, I., MacDonald, B. T., Levin, S. I., Soltesz, I., Benna, P., Montalenti, E., Isom, L. L., Goldin, A. L., and Meisler, M. H. (2004) *J. Neurosci.* **24**, 10022-10034
5. Rusconi, R., Scalmani, P., Cassulini, R. P., Giunti, G., Gambardella, A., Franceschetti, S., Annesi, G., Wanke, E., and Mantegazza, M. (2007) *J. Neurosci.* **27**, 11037-11046
6. Lupoglazoff, J. M., Cheav, T., Baroudi, G., Berthet, M., Denjoy, L., Cauchemez, B., Extramiana, F., Chahine, M., and Guicheney, P. (2001) *Circ. Res.* **89**, E16-E21
7. Deschenes, I., Baroudi, G., Berthet, M., Barde, I., Chalvidan, T., Denjoy, I., Guicheney, P., and Chahine, M. (2000) *Cardiovascular Research* **46**, 55-65
8. Makita, N., Behr, E., Shimizu, W., Horie, M., Sunami, A., Crotti, L., Schulze-Bahr, E., Fukuhara, S., Mochizuki, N., Makiyama, T., Itoh, H., Christiansen, M., McKeown, P., Miyamoto, K., Kamakura, S., Tsutsui, H., Schwartz, P. J., George, A. L., and Roden, D. M. (2008) *J. Clin. Invest.* **118**, 2219-2229
9. An, R. H., Wang, X. L., Kerem, B., Benhorin, J., Medina, A., Goldmit, M., and Kass, R. S. (1998) *Circ. Res.* **83**, 141-146
10. Abriel, H., Wehrens, X. H. T., Benhorin, J., Kerem, B., and Kass, R. S. (2000) *Circulation* **102**, 921-925
11. Bezzina, C., Veldkamp, M. W., van den Berg, M. P., Postma, A. V., Rook, M. B., Viersma, J. W., van Langen, I. M., Tan-Sindhunata, G., Bink-Boelkens, M. T. E., van der Hout, A. H., Mannens, M., and Wilde, A. A. M. (1999) *Circ. Res.* **85**, 1206-1213
12. Remme, C. A., Verkerk, A. O., Nuyens, D., van Ginneken, A. C. G., van Brunschot, S., Belterman, C. N. W., Wilders, R., van Roon, M. A., Tan, H. L., Wilde, A. A. M., Carmeliet, P., de Bakker, J. M. T., Veldkamp, M. W., and Bezzina, C. R. (2006) *Circulation* **114**, 2584-2594
13. Rivolta, I., Abriel, H., Tateyama, M., Liu, H. H., Memmi, M., Vardas, P., Napolitano, C., Priori, S. G., and Kass, R. S. (2001) *J. Biol. Chem.* **276**, 30623-30630
14. Glaaser, I. W., Bankston, J. R., Liu, H. J., Tateyama, M., and Kass, R. S. (2006) *J. Biol. Chem.* **281**, 24015-24023
15. Makita, N., Horie, M., Nakamura, T., Ai, T., Sasaki, K., Yokoi, H., Sakurai, M., Sakuma, I., Otani, H., Sawa, H., and Kitabatake, A. (2002) *Circulation* **106**, 1269-1274
16. Ackerman, M. J., Siu, B. L., Sturner, W. Q., Tester, D. J., Valdivia, C. R., Makielski, J. C., and Towbin, J. A. (2001) *JAMA* **286**, 2264-2269
17. Ikura, M., Kay, L. E., and Bax, A. (1990) *Biochemistry* **29**, 4659-4667
18. Tjandra, N., Kuboniwa, H., Ren, H., and Bax, A. (1995) *Eur. J. Biochem.* **230**, 1014-1024
19. Shindyalov, I. N., and Bourne, P. E. (1998) *Protein Eng.* **11**, 739-747
